# Supplementary material
Source: Springer Nature journal article supplement (https://www.springermedizin.de/resource/supplementary/12974_2011_435_MOESM1_ESM.pdf/9601294)

subunit

TH

merge

Nox2

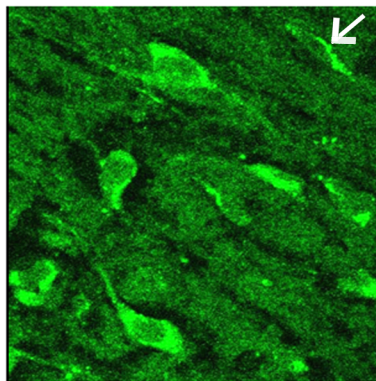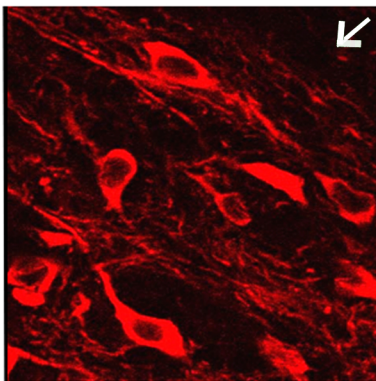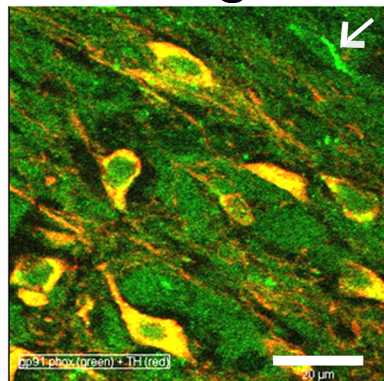

p47

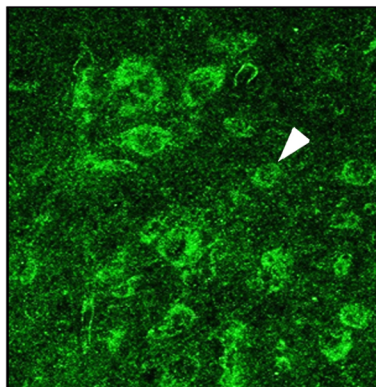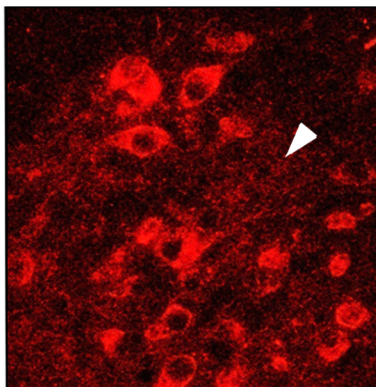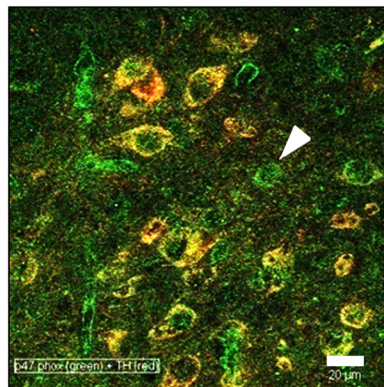

p67

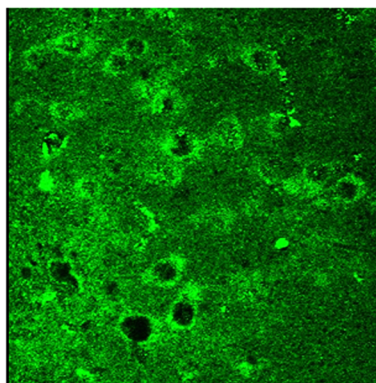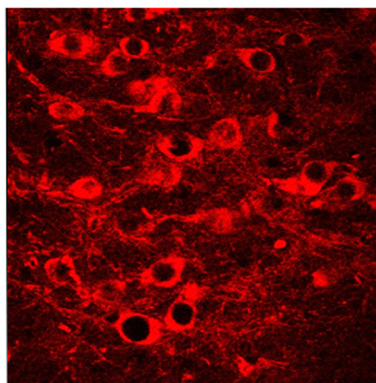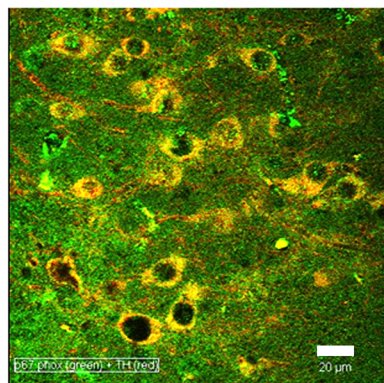

Supplement: MOESM1 [file 9601294]
